# Supplementary material
Source: PubMed Central journal article supplement (PMC2206591)

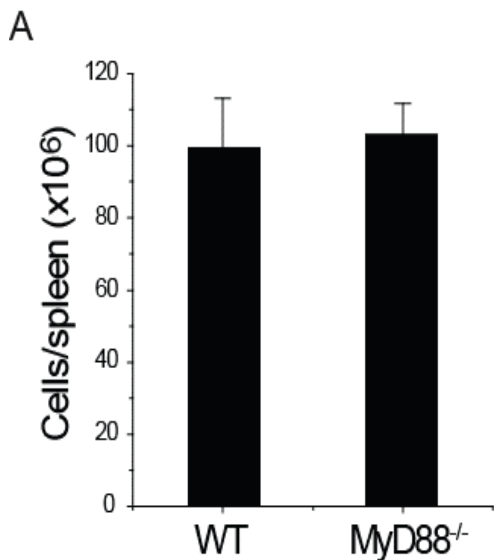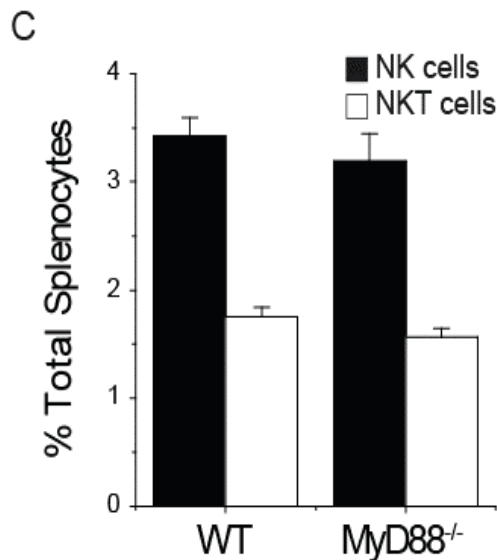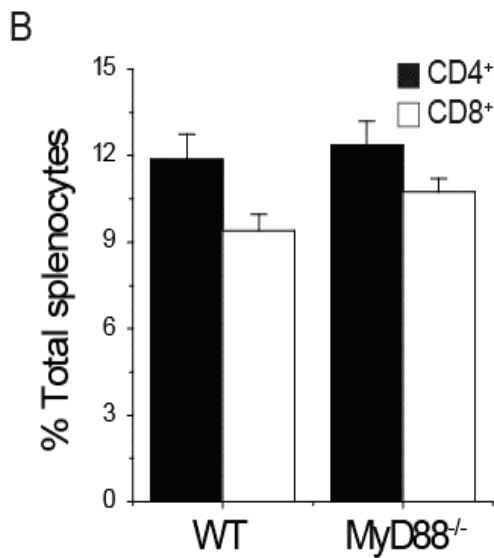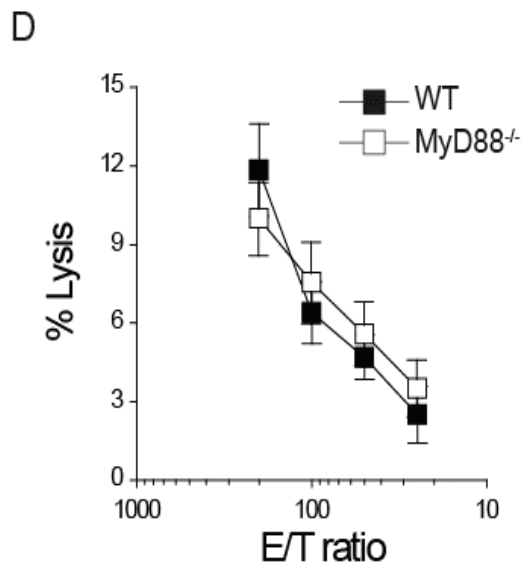

Supplement: pnas_0708594105_3.pdf [file pnas_0708594105_3.pdf]
